# Supplementary material
Source: publisher site journal article supplement (https://www.dovepress.com/article/552328)
Supplement: Supplementary file 1 [file Supplementary%20materials.docx]

**
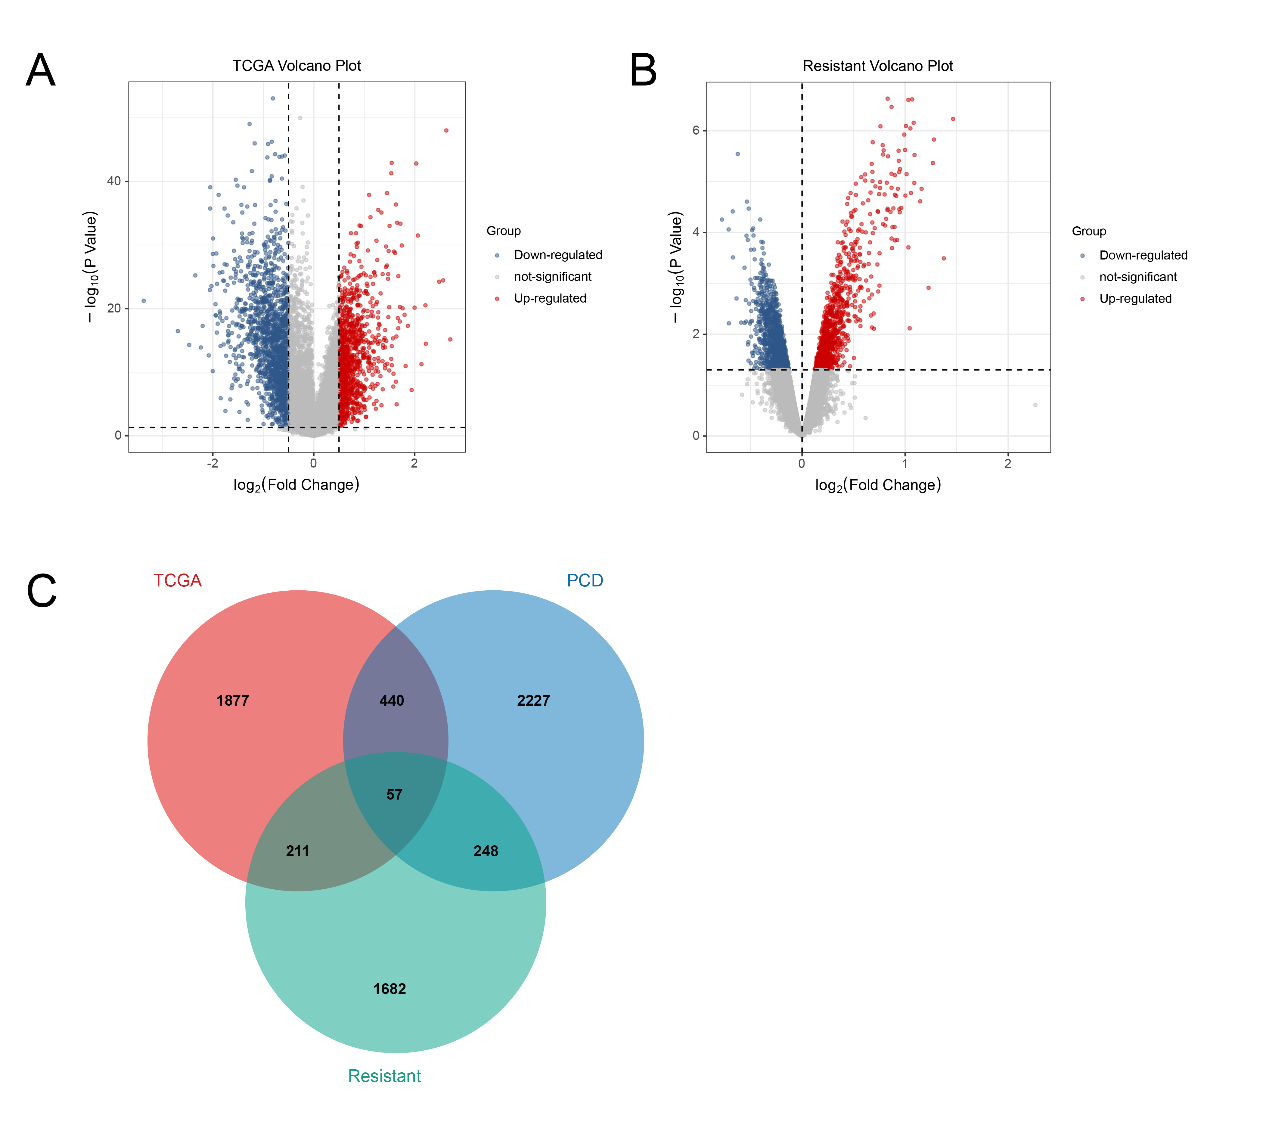
**

**Supplementary Figure 1 The differentially expressed genes (DEGs) and differentially expressed 6-acetoxy-anopterine (6-AA) resistant programmed cell death-related genes (DEPGs) in current study.** A, the volcano plot revealed the DEGs based on TCGA dataset. B, the volcano plot revealed the DEGs resistant to the drug 6-AA. C, the VENN plot showed that DEPGs in current study.


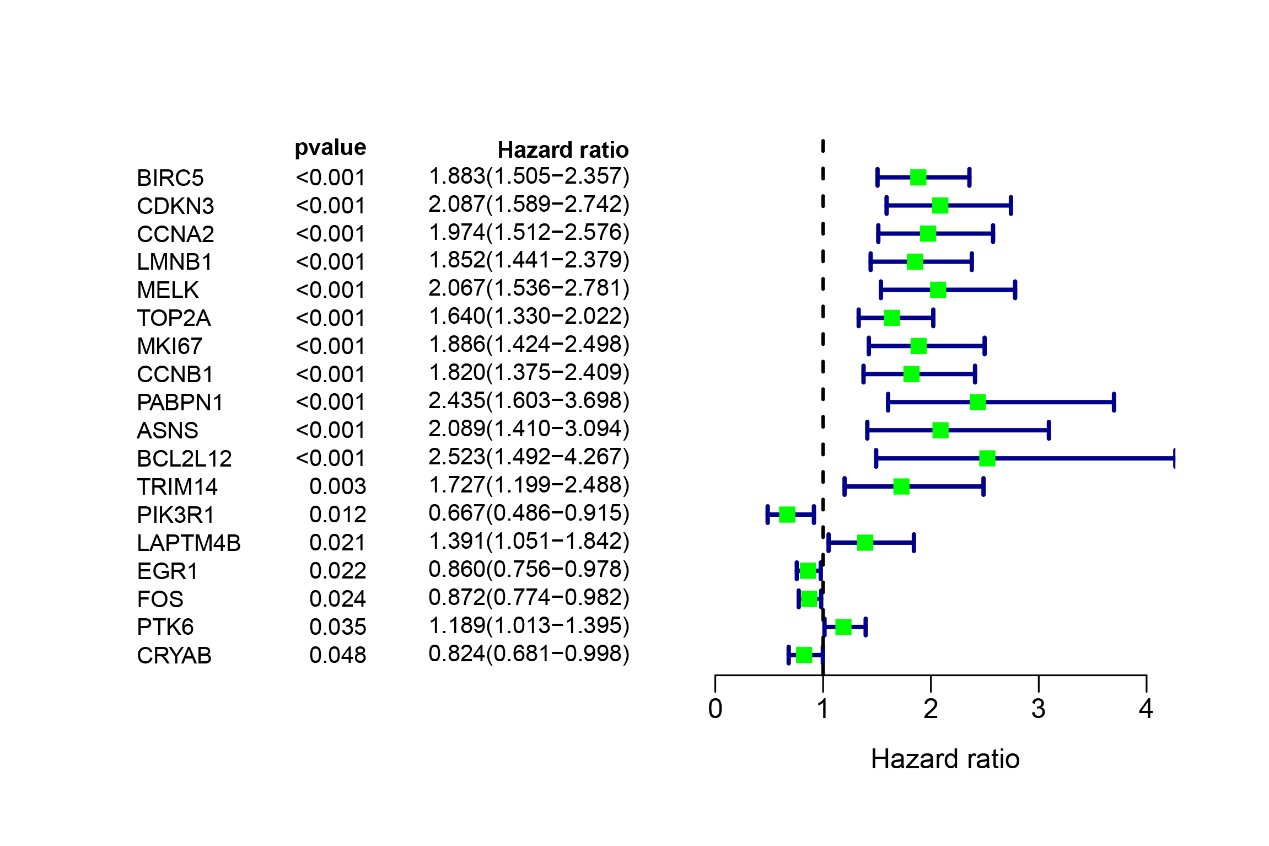


**Supplementary Figure 2 The prognostic genes revealed by Least absolute shrinkage and selection operator (LASSO) Cox analysis in current study.**
